# Supplementary material for: Impaired BKCa channel function in native vascular smooth muscle from humans with type 2 diabetes
Source: PubMed Central journal article supplement (PMC5656614; doi:10.1038/s41598-017-14565-9), 2017-10-25
Supplement: 41598_2017_14565_MOESM1_ESM.pdf [file 41598_2017_14565_MOESM1_ESM.pdf]

**Impaired BK<sub>Ca</sub> channel function in native vascular smooth muscle from humans with type 2 diabetes**

Madeline Nieves-Cintrón<sup>1\*</sup>, Arsalan U. Syed<sup>1</sup>, Olivia R. Buonarati<sup>1</sup>, Robert R. Rigor<sup>1</sup>, Matthew A. Nystoriak<sup>2</sup>, Debapriya Ghosh<sup>1</sup>, Kent C. Sasse<sup>3</sup>, Sean M. Ward<sup>4</sup>, Luis F. Santana<sup>5</sup>, Johannes W. Hell<sup>1</sup> and Manuel F. Navedo<sup>1\*</sup>

<sup>1</sup>Department of Pharmacology, University of California, Davis, CA 95616.

<sup>2</sup>Diabetes and Obesity Center, Department of Medicine, University of Louisville, Louisville, KY 40202.

<sup>3</sup>Sasse Surgical Associates, Reno, NV 89502.

<sup>4</sup>Department of Physiology and Cell Biology, University of Nevada, Reno School of Medicine, Reno, NV 89557.

<sup>5</sup>Department of Physiology & Membrane Biology, University of California, Davis, CA 95616.

\*Correspondence to:

Madeline Nieves-Cintrón, PhD  
Department of Pharmacology  
University of California, Davis  
One Shields Avenue, Davis, CA 95616  
email: [mnieves@ucdavis.edu](mailto:mnieves@ucdavis.edu)  
Tel. 530-752-6880  
Fax. 530-752-7710

Manuel F. Navedo, PhD  
Department of Pharmacology  
University of California, Davis  
One Shields Avenue, Davis, CA 95616  
email: [mfnavedo@ucdavis.edu](mailto:mfnavedo@ucdavis.edu)  
Tel. 530-752-6880  
Fax. 530-752-7710

## Supplementary Information

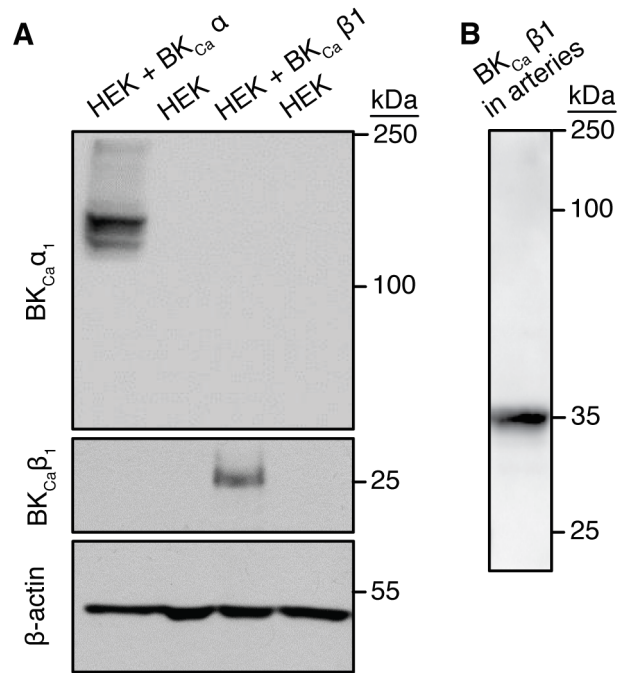

**Supplementary Fig. S1: Validation of BK<sub>Ca</sub> α1 and BK<sub>Ca</sub> β1 subunit antibodies.** **A)** Representative immunoreactive bands corresponding to BK<sub>Ca</sub> α1 or BK<sub>Ca</sub> β1 subunits in lysates from untransfected HEK293 cells, and HEK293 cells transfected with either BK<sub>Ca</sub> α1 or BK<sub>Ca</sub> β1 subunit. β-actin was used as loading control (n = 3 lysates per condition). **B)** Representative Western blot showing only one immunoreactive band of the expected molecular weight and corresponding to BK<sub>Ca</sub> β1 in an arterial lysate from non-diabetic patients.

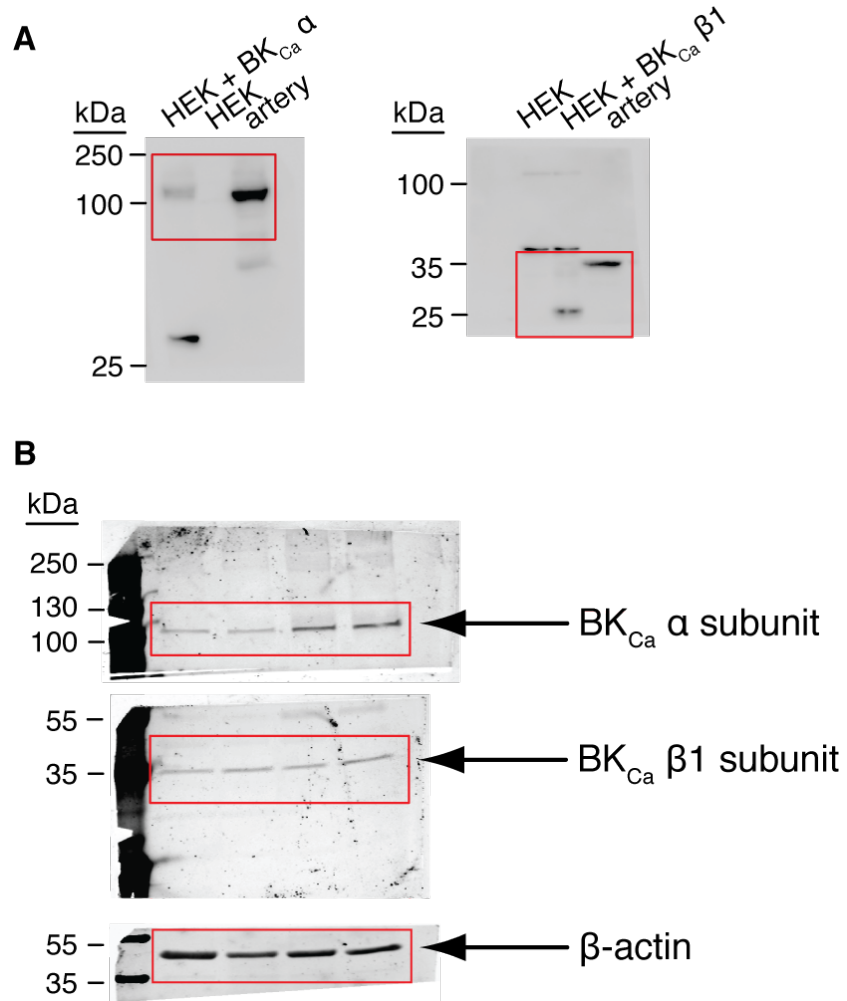

**Supplementary Fig. S2: Full-length blots corresponding to A) Figure 6A and B) Figure 6B. Red boxes indicate the crop region displayed in the main figure.**

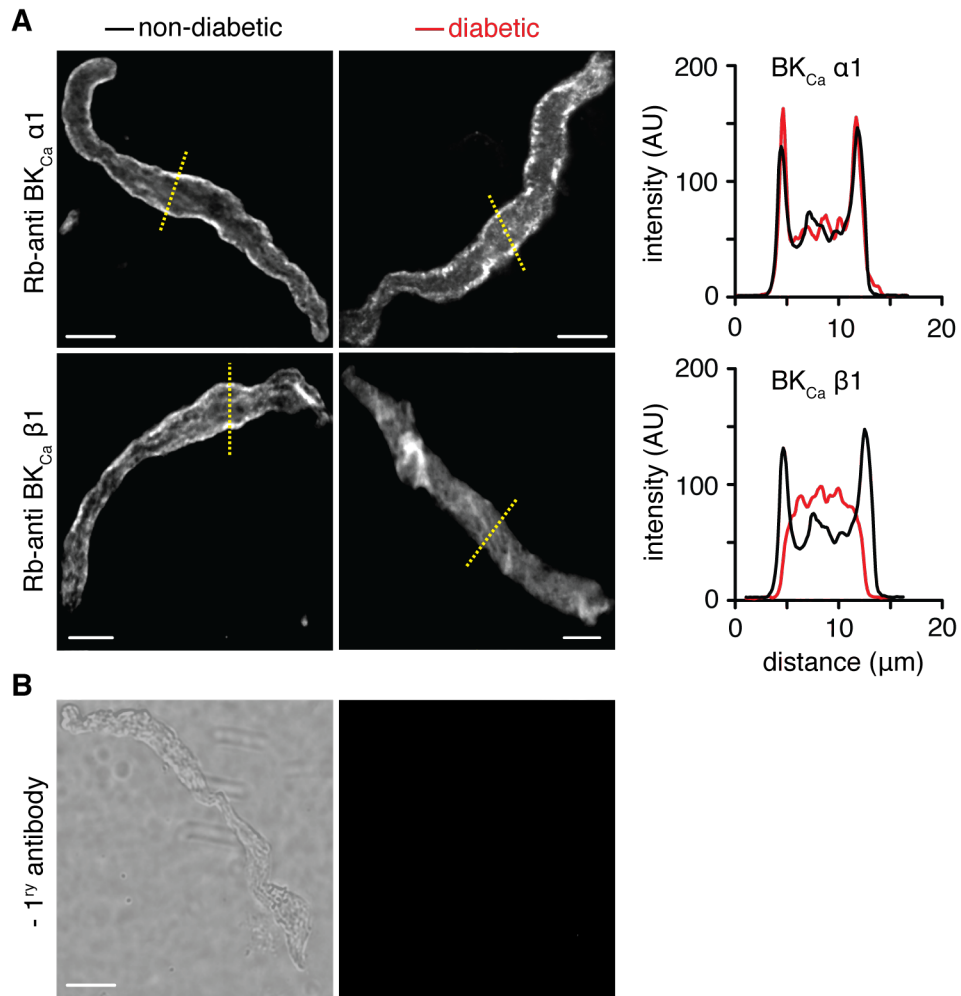

**Supplementary Fig. S3: Comparison of the subcellular localization of BK<sub>Ca</sub> α1 and BK<sub>Ca</sub> β1 subunit in vascular smooth muscle from obese non-diabetic and diabetic patients. A) Confocal images (*left panels*) and line profile analysis along the dotted yellow lines from the confocal images (*right panels*) of BK<sub>Ca</sub> α1- and BK<sub>Ca</sub> β1-associated fluorescence in vascular smooth muscle from non-diabetic and diabetic patients. (n = 10-13 cells per condition. B) Exemplary DIC and confocal image of a human vascular smooth muscle in which the primary antibody was excluded from the preparation (e.g. negative control). Scale bar = 10 μm.**

**Supplementary Table S1: Available Patients Characteristics**

All human arteries and dissociated vascular smooth muscle were obtained from obese non-diabetic and clinically diagnosed diabetic patients undergoing surgical sleeve gastrectomy

| <b>parameters</b> | <b>non-diabetic</b>    | <b>diabetic</b>        |
|-------------------|------------------------|------------------------|
| Sex (female/male) | 23 F (88%) / 3 M (12%) | 17 F (65%) / 9 M (35%) |
| age (years)       | 47.4 ± 2.3             | 45 ± 2.2               |
| HbA1c (mg/dL)     | 5.8 ± 0.2              | 7.1 ± 0.9              |
| HbA1c (mmol/mol)  | 39.5 ± 2.1             | 54.0 ± 9.5             |

Values are mean ± SEM.

**Supplementary Table S2: Characteristics of Arteries in Pressure Myography Experiments**

| <b>metabolic state</b>                           |                     |                 |
|--------------------------------------------------|---------------------|-----------------|
| <b>parameters</b>                                | <b>non-diabetic</b> | <b>diabetic</b> |
| age (years; # arteries and sex)                  | 47.6 ± 5.1 (3M, 5F) | 38.8 ± 3.1 (6F) |
| baseline diameter (µm)                           | 39.6 ± 6.5          | 28.5 ± 2.3      |
| myogenic tone (%)                                | 44 ± 8.0            | 49.3 ± 7.0      |
| diameter of peak IbTx response (µm)              | 32.3 ± 5.9          | 27.2 ± 2.2      |
| IbTx-induced constriction (%)                    | 23.2 ± 4.6          | 4.4 ± 3.5*      |
| diameter of peak 60 K <sup>+</sup> response (µm) | 24.3 ± 5.5          | 12.8 ± 3.0      |
| 60 mM K <sup>+</sup> -induced constriction (%)   | 75.0 ± 4.2          | 71.0 ± 6.3      |
| passive diameter (µm)                            | 73.3 ± 6.4          | 58.8 ± 4.6      |

Values are mean ± SEM (\*  $P < 0.05$ ; Mann-Whitney test).
